# Supplementary material for: Synthesis of a ruthenium–graphene quantum dot–graphene hybrid as a promising single-atom catalyst for electrochemical nitrogen reduction with ultrahigh yield rate and selectivity
Source: Royal Society of Chemistry journal article supplement (doi:10.1039/d1ta07158k), 2021-01-01
Supplement: d1ta07158k1.pdf [file d1ta07158k1.pdf]

## Supporting Information

### Synthesis of ruthenium-graphene quantum dot-graphene hybrid as promising single-atom catalyst for electrochemical nitrogen reduction with ultrahigh yield rate and selectivity

Li Ruiyi,<sup>a</sup> He Keyang,<sup>a</sup> Xu Pengwu,<sup>a</sup> Wang Wendong,<sup>a</sup> Li Nana,<sup>a</sup> Zhu Haiyan,<sup>a</sup> Li Zaijun<sup>a,\*</sup> and Liu Xiaohao<sup>a,\*</sup>

#### Experimental Details

##### Ammonia determination

The ammonia concentration in electrolyte was detected by indophenol blue method. In a typical procedure, 2 mL of the electrolyte after nitrogen electrochemical reduction reaction was mixed with 2 mL of 1 M NaOH solution containing salicylic acid (5 wt%) and sodium citrate (5 wt%), added 1 mL of 0.05 M NaClO and 0.2 mL of C<sub>5</sub>FeN<sub>6</sub>Na<sub>2</sub>O (1 wt%). After that, the absorbance at 655nm was measured using an UV-vis spectrophotometer. The concentration-absorbance curve was calibrated using standard ammonia chloride solution with a series of concentrations.

##### Hydrazine determination

The hydrazine in the electrolyte was measured by the method of Watt and Chrisp. Here, the mixture of para-(dimethylamino) benzaldehyde (0.62 g), HCl (12 mol L<sup>-1</sup>, 4 mL), and ethanol (40 mL) was used as a color reagent. 2 mL of the electrolyte after electrolysis was mixed with 2 mL of color reagent. The absorbance at 455 nm was determined. The concentration-absorbance curve was calibrated using standard hydrazine hydrate solution with a series of concentrations.

##### <sup>15</sup>N isotope labelling experiment

An isotopic labelling experiment used <sup>15</sup>N<sub>2</sub> with the N15 enrichment of 99% as the feeding gas to clarify the source of NH<sub>3</sub>. After <sup>15</sup>N<sub>2</sub> electrochemical reduction for 2 h with 10 cycles, the electrolyte was concentrated into 10 mL, the obtained <sup>15</sup>NH<sub>4</sub><sup>+</sup> was identified by using <sup>1</sup>H NMR spectroscopy (AVANCE III HD 400 MHz).

## Figures and Tables

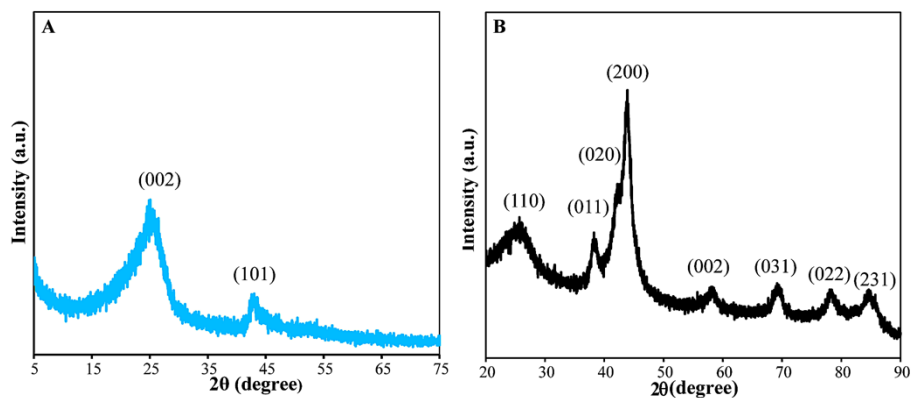

Fig. S1. XRD patterns of Ru-His-GQD-Ru (A) and Ru-graphene nanocomposite (B)

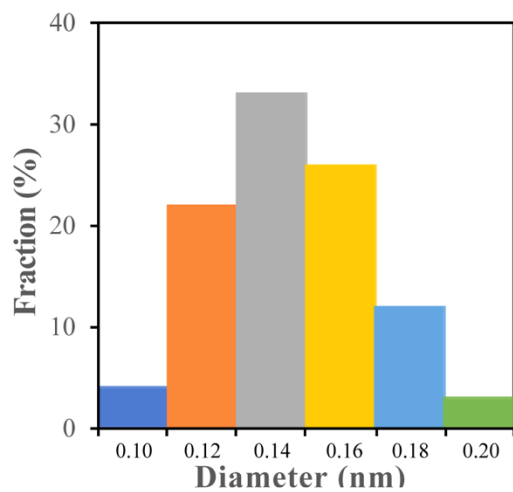

Fig. S2. Size distribution of the Ru particles in Ru-His-GQD-G

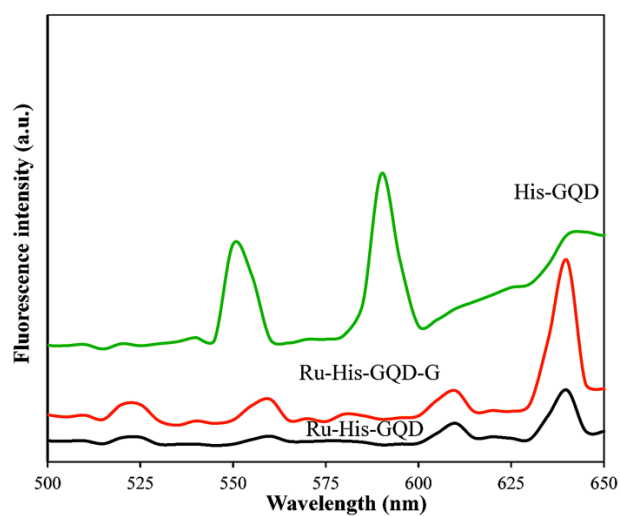

Fig. S3. Solid state fluorescence spectra of His-GQD, Ru-His-GQD and Ru-His-GQD-G

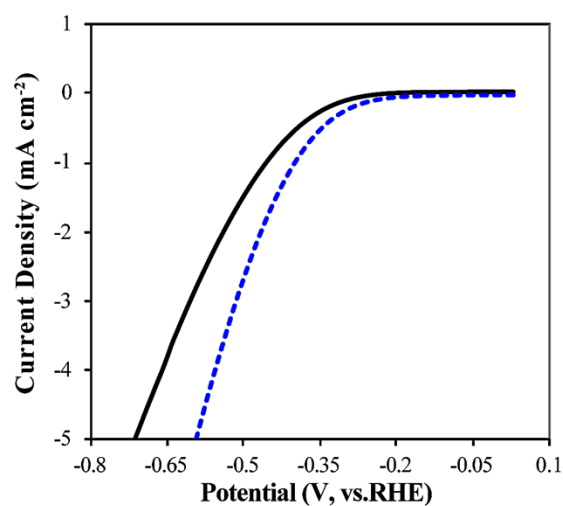

Fig. S4. The linear sweep voltammetric curves of Ru-His-GQD-G electrode in Ar- or N<sub>2</sub>-saturated 0.05 M aqueous H<sub>2</sub>SO<sub>4</sub> at a scan rate of 5 mV s<sup>-1</sup>

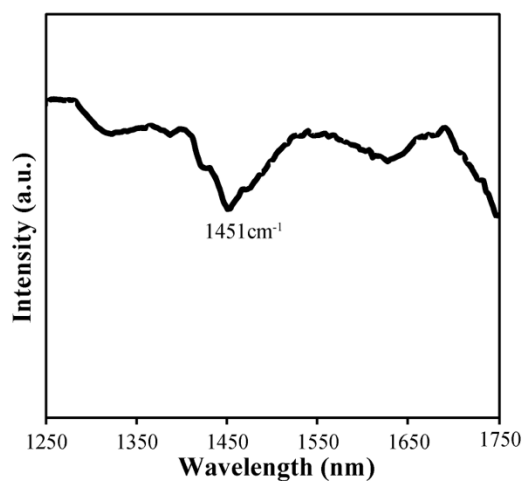

Fig. S5. The FTIR spectrum of the electrolyte for Ru-His-GQD-G. The electrolyte was measured in N<sub>2</sub>-saturated 0.05 M H<sub>2</sub>SO<sub>4</sub> at -0.05 V vs RHE for 12 h

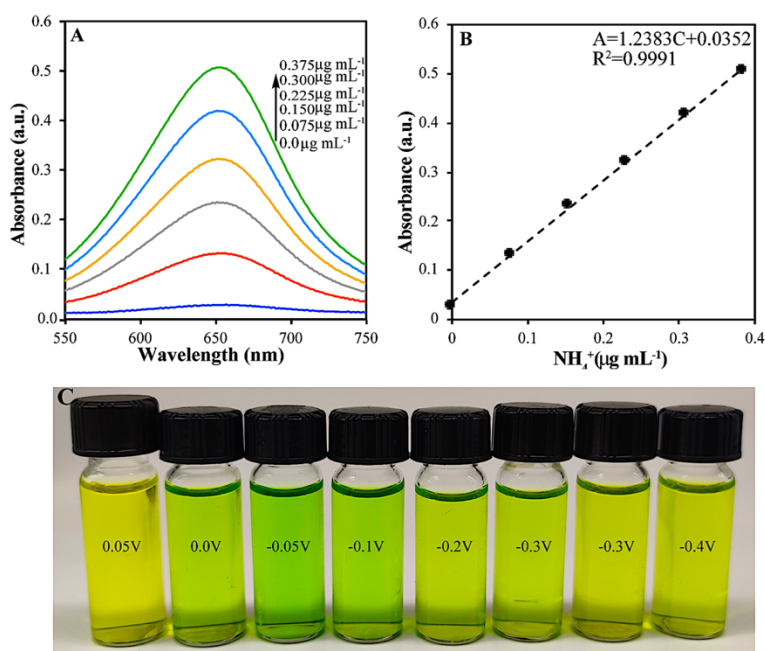

**Fig. S6A.** UV-vis curves and (b) concentration-absorbance curve of  $\text{NH}_4^+$  ions solution with a series of standard concentration. The absorbance at 655 nm was measured by UV-vis spectrophotometer. B: The standard curve showed good linear relation of absorbance with  $\text{NH}_4^+$  ion concentration. C: Optical photographs of eight electrolytes prepared by NRR over Ru-His-GQD-G at different potentials for 2 h

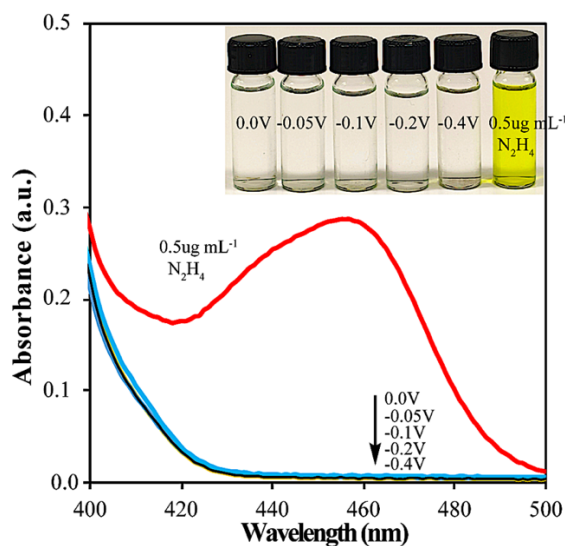

**Fig. S7.** The UV-vis curves and optical photographs of five electrolytes produced by NRR over Ru-His-GQD-G at different potentials and 0.5  $\mu\text{g mL}^{-1}$   $\text{N}_2\text{H}_4 \cdot \text{H}_2\text{O}$  standard solution

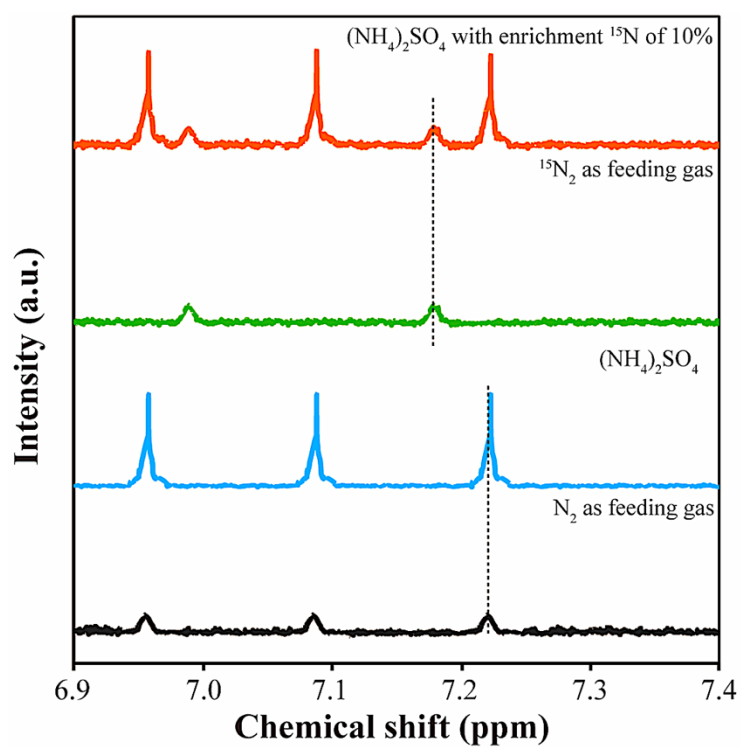

**Fig. S8**  $^1\text{H}$  NMR spectra of both  $\text{NH}_4^+$  and  $^{15}\text{NH}_4^+$  produced from NRR using  $\text{N}_2$  and  $^{15}\text{N}_2$  as the feeding gas

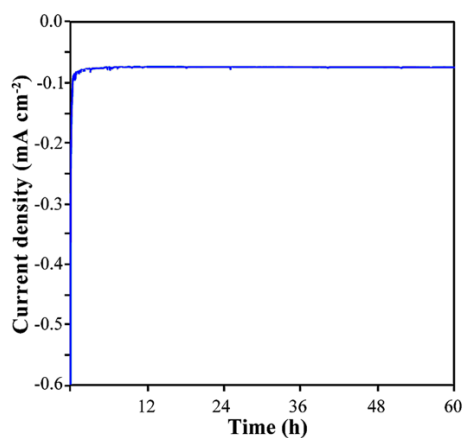

**Fig. S9** Current density profile versus time under applied potential of -0.05 V (vs. RHE) over Ru-His-GQD-G electrode

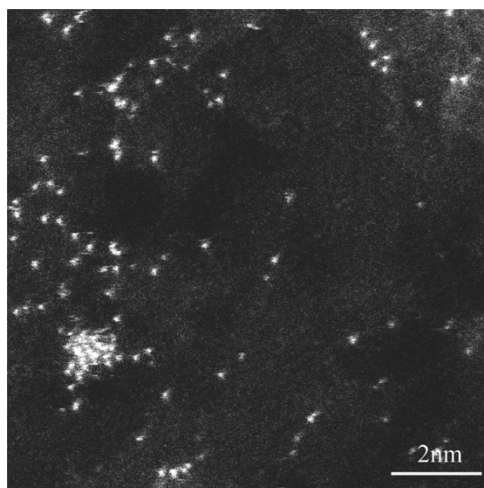

**Fig. S10** The HAADF-STEM image of Ru-His-GQD-G after N<sub>2</sub> electrochemical reduction reaction

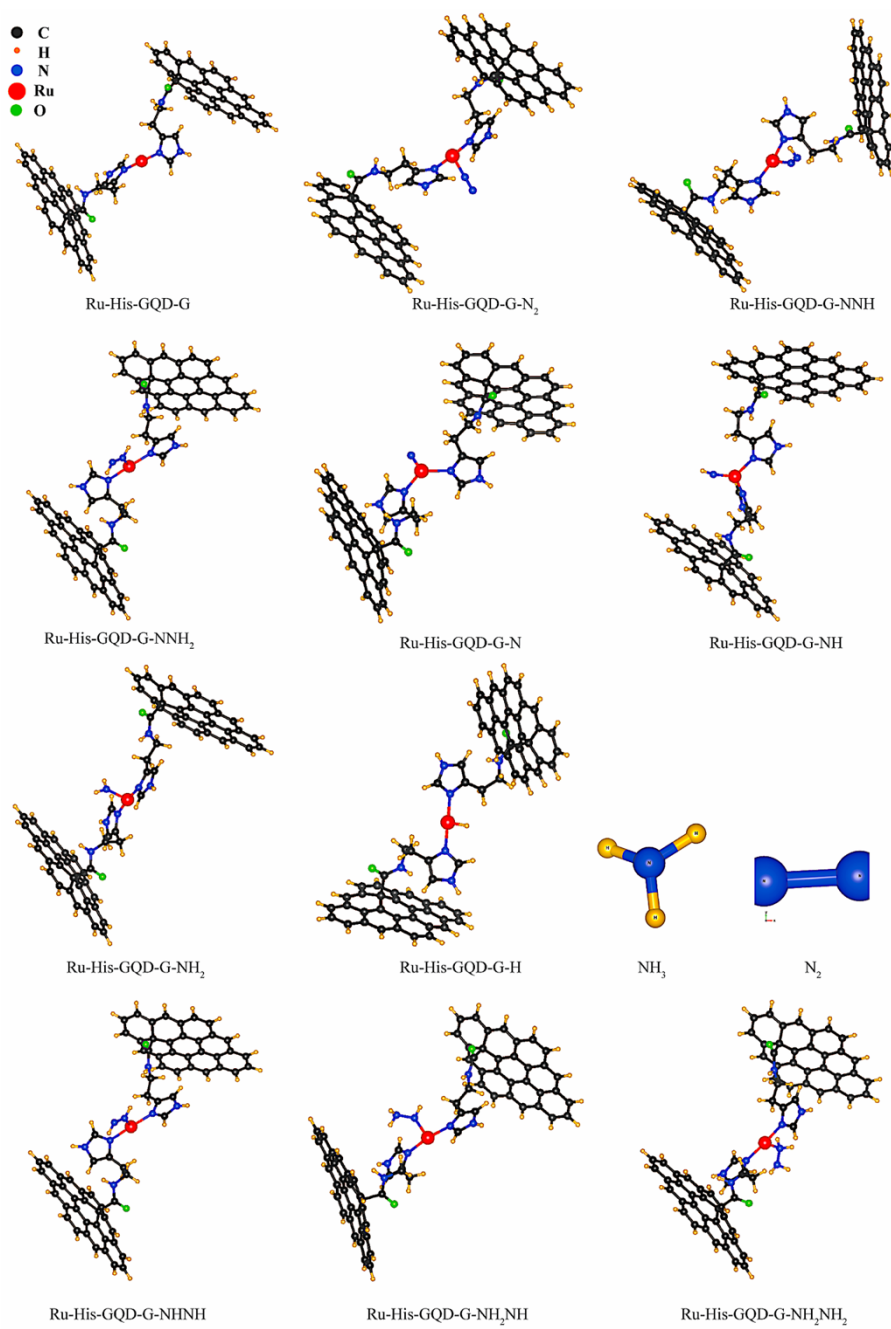

**Fig. S11** Optimized geometry of \*H and reaction intermediates for NRR on Ru-His-GQD-G electrode

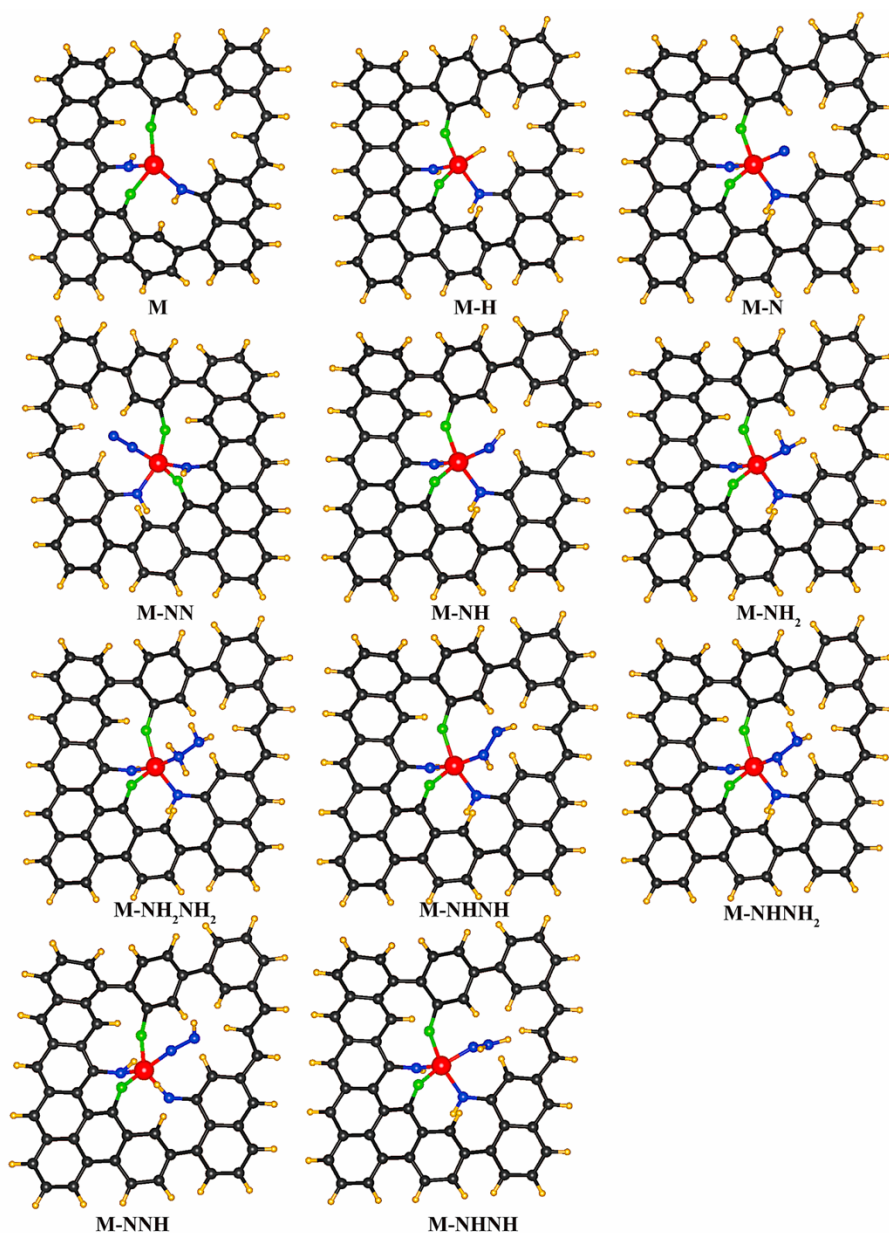

Fig. S12 Optimized geometry of \*H and reaction intermediates for NRR on G-Ru electrode



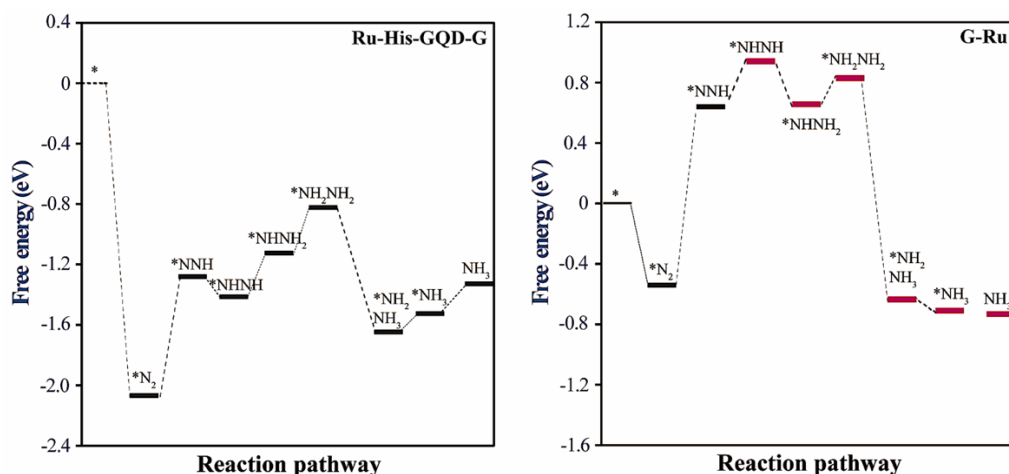

**Fig. S13** Calculation models and free energy diagrams for NRR of Ru-His-GQD-G electrode and G-Ru electrode

**Table s1** EXAFS data fitting results of Ru foil and Ru-His-GQD-G\*

| Sample       | Path  | CN  | R(Å) | $\sigma^2(\times 10^{-3} \text{Å}^2)$ | $\Delta E_0$ (eV) | R factor (%) |
|--------------|-------|-----|------|---------------------------------------|-------------------|--------------|
| Ru foil      | Ru-Ru | 12  | 2.6  | 0.0026                                | -                 | 1.50         |
|              |       |     | 7    | 1                                     | 7.767             | %            |
| Ru-His-GQD-G | Ru-N  | 2.0 | 2.1  | 0.01                                  | 1.93              | 1.60%        |
|              |       | 1   | 3    | 1                                     |                   |              |

\* The EXAFS spectra fits were performed on the first coordination shell over the FT of the  $k^3$ -weighted  $\chi(k)$  function in the  $\Delta k = 3\text{-}12 \text{ Å}^{-1}$  interval. The amplitude reduction factor  $S_0^2$  was fixed to 0.98 relative to Ru foil. The CN represents average coordination number. R represents interatomic distance.  $\sigma^2$  represents square variation in path length.  $\Delta E_0$  represents edge-energy shift. The R-factor represents the goodness of fit.

**Table S2** Catalytic activities of various Ru-based materials for nitrogen electrochemical reduction into ammonia

| Catalyst | Electrolyte | Potential<br>(V, vs.<br>RHE) | Faradaic<br>Efficiency<br>(%) | N <sub>2</sub> electrochemical<br>reduction activity<br>( $\mu\text{g}_{\text{NH}_3} \cdot \text{mg}_{\text{catalyst}}^{-1} \cdot \text{h}^{-1}$ ) | Ref. |
|----------|-------------|------------------------------|-------------------------------|----------------------------------------------------------------------------------------------------------------------------------------------------|------|
|----------|-------------|------------------------------|-------------------------------|----------------------------------------------------------------------------------------------------------------------------------------------------|------|

|                                                                                                                            |                                       |       |       |        |              |
|----------------------------------------------------------------------------------------------------------------------------|---------------------------------------|-------|-------|--------|--------------|
| Ru single atoms distributed on nitrogen-doped carbon                                                                       | 0.05 M H <sub>2</sub> SO <sub>4</sub> | -0.2  | 29.6  | 120.9  | 1            |
| Single Ru sites supported on N-doped porous carbon and ZrO <sub>2</sub>                                                    | 0.1 M HCl                             | -0.21 | 21    | 3.665  | 2            |
| Ru single atoms distributed in a matrix of graphitic carbon nitride                                                        | 0.5 M KOH                             | 0.05  | 8.3   | 23     | 3            |
| Fusiform-like Ru-Cu alloy nanosheets                                                                                       | 0.1 M HCl                             | -0.1  | 7.2   | 53.6   | 4            |
| Ru(III) polyethyleneimine catalysts supported on carboxyl-modified carbon nanotubes                                        | 0.1 M KOH                             | -0.1  | 30.93 | 188.90 | 5            |
| Single-atomic ruthenium modified Mo <sub>2</sub> CTX MXene nanosheets                                                      | 0.5 M K <sub>2</sub> SO <sub>4</sub>  | -0.3  | 25.77 | 40.57  | 6            |
| Ruthenium nanocrystals anchored on reduced graphene oxide modified with different aliphatic thiols to achieve M-S linkages | 0.05 M H <sub>2</sub> SO <sub>4</sub> | -0.1  | 11    | 50     | 7            |
| Ru-His-GQD-G                                                                                                               | 0.05 M H <sub>2</sub> SO <sub>4</sub> | -0.05 | 42.6  | 226    | Present work |

## References

- 1 Z.G. Geng, Y. Liu, X.D. Kong, P. Li, Z.Y. Liu, J.J. Du, M. Shu, R. Si, J. Zeng, *Adv. Mater.*, 2018, **30**, 1803498.
- 2 H.C. Tao, C. Choi, L.X. Ding, Z. Jiang, Z.S. Han, M.W. Jia, Q. Fan, Y.N. Gao, H.H. Wang, A.W. Robertson, S. Hong, Y. Jung, S.Z. Liu, Z.Y. Sun, *Chem*, 2019, **5**, 204-219.
- 3 B. Yu, H. Li, J. White, S. Donne, J.B. Yi, S.B. Xi, Y. Fu, G. Henkelman, H. Yu, Z.L. Chen, T.Y. Ma, *Adv. Funct. Mater.*, 2019, **6**, 1905665.
- 4 Y. Jin, X. Ding, L.L. Zhang, M.Y. Cong, F.F. Xu, Y. Wei, S.J. Hao, Y. Gao, *Chem. Commun.*, 2020, **56**, 11477-11480.

- 5 G.R. Xu, M. Batmunkh, S. Donne, H.N. Jin, J.X. Jiang, Y. Chen, T.Y. Ma, *J. Mater. Chem. A*, 2019, **7**, 25433-25440.
- 6 W. Peng, M. Luo, X.D. Xu, K. Jiang, M. Peng, D.C. Chen, T.S. Chan, Y.W. Tan, *Adv Energy Mater.*, 2020, **10**, 2001364.
- 7 M.I. Ahmed, C.W. Liu, Y. Zhao, W.H. Ren, X.J. Chen, S. Chen, C. Zhao, *Angew. Chem.*, 2020, **59**, 21465-21469.
